# Supplementary material for: Differential Apoptotic Effects of Bee Product Mixtures on Normal and Cancer Hepatic Cells
Source: MDPI journal article supplement (doi:10.3390/antiox12030615), 2023-03-02
Supplement: s1 [file s1]

---

# Differential apoptotic effects of bee product mixtures on normal and cancer hepatic cells

Vanesa Sánchez-Martín<sup>1</sup>, Paloma Morales<sup>1</sup>, Amaia Iriondo-DeHond<sup>1</sup>, Xavier F. Hospital<sup>2</sup>, Manuela Fernández<sup>2</sup>, Eva Hierro<sup>2</sup> and Ana I. Haza<sup>1\*</sup>

<sup>1</sup> Departamento de Nutrición y Ciencia de los Alimentos, Sección Departamental de Nutrición y Ciencia de los Alimentos, Facultad de Veterinaria, Universidad Complutense, 28040 Madrid, Spain

<sup>2</sup> Departamento de Farmacia Galénica y Tecnología de los Alimentos, Sección Departamental de Farmacia Galénica y Tecnología de los Alimentos, Facultad de Veterinaria, Universidad Complutense, 28040 Madrid, Spain

\* Correspondence: hanais@ucm.es; Tel.: +34-91-394-3749

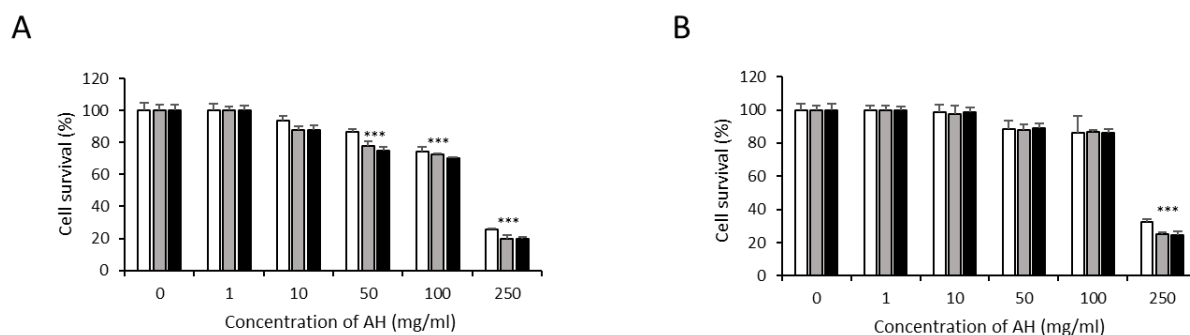

**Figure S1.** Effect of sample 17 (AH) on HepG2 (A) and WRL-68 (B) cells viability by MTT assay. Cells were cultured with different doses of samples (0-250 mg/ml) for 24 (□), 48 (■), and 72 hours (■). Asterisks indicate a significant difference from the control (0). \*\*\* $P \leq 0.001$ .

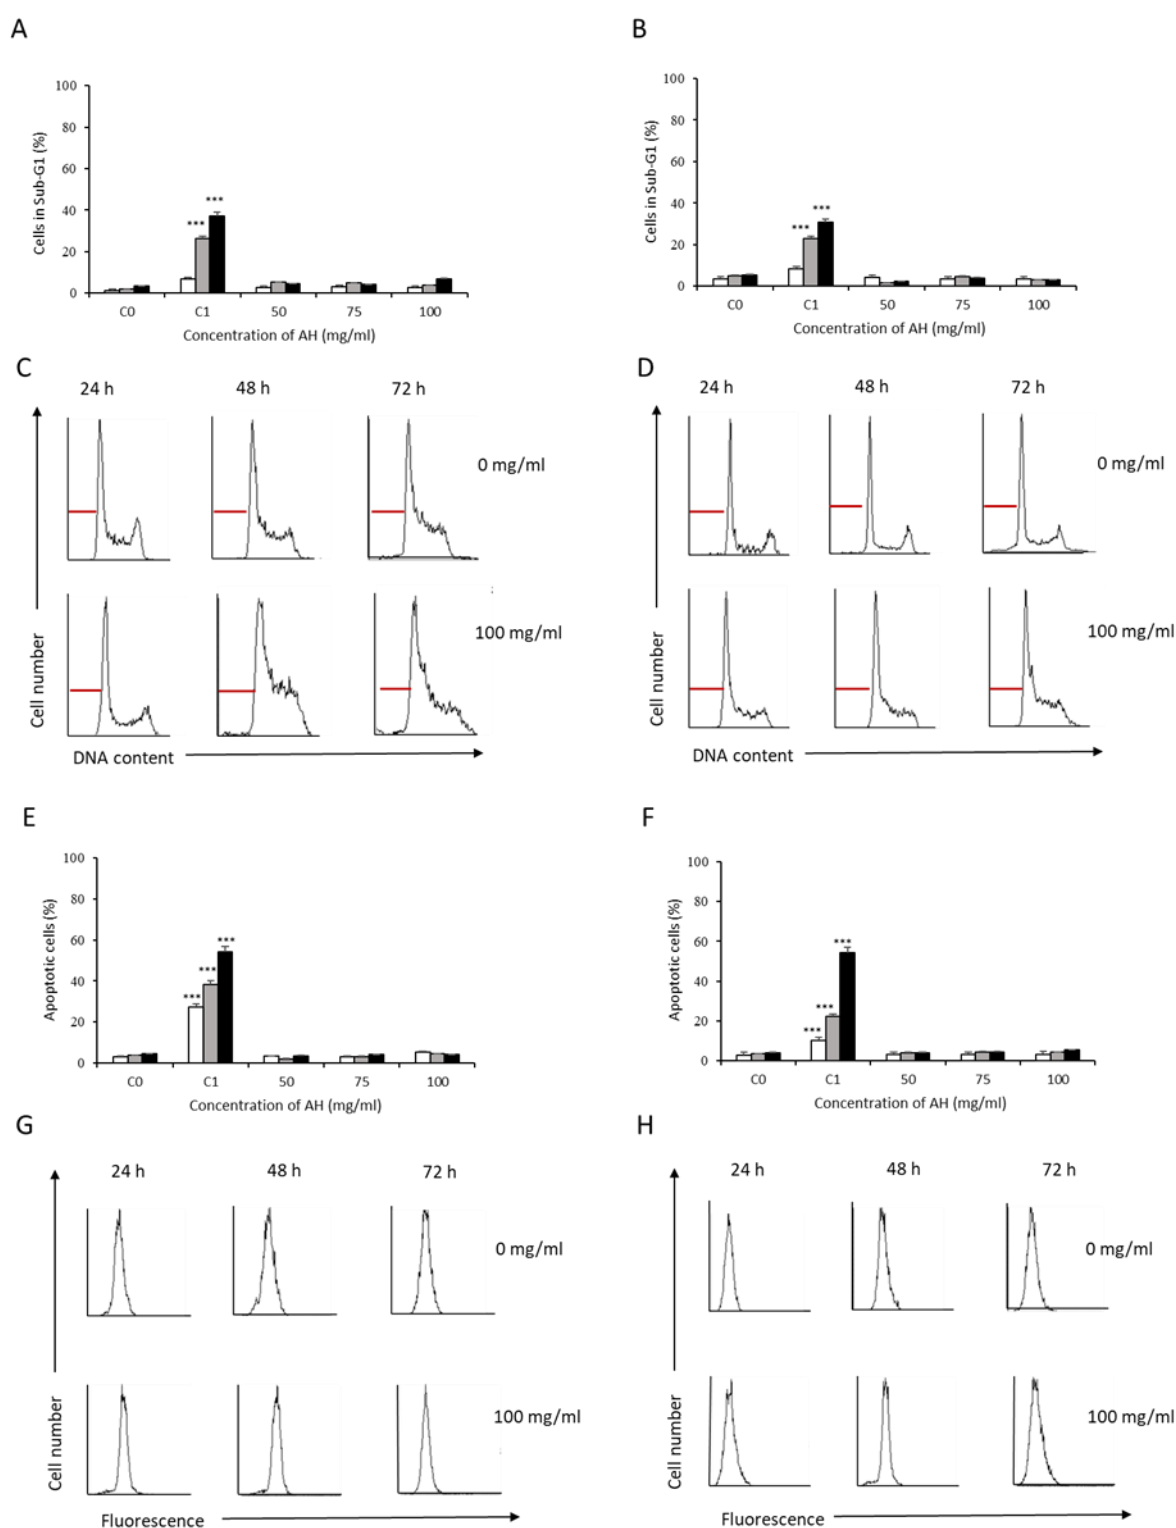

**Figure S2.** Effect of sample 17 (AH) on human liver cells apoptosis. The cell cycle was determined by flow cytometry. HepG2 (A) and WRL-68 (B) cells were treated with different doses of sample 17 (50, 75, and 100 mg/ml) for 24 (□), 48 (■), and 72 hours (■). Representative histograms of the cell cycle of HepG2 (C) and WRL-68 (D) cells are shown; the red line indicates Sub-G1 phase. The percentage of apoptosis was analyzed by flow cytometry using the TUNEL assay. HepG2 (E) and WRL-68 (F) cells were cultured with different doses of sample 17 (50, 75, and 100 mg/ml) for 24 (□), 48 (■), and 72 hours (■). Representative histograms of the fluorescence intensity in HepG2 (G) and WRL-68 (H) cells are presented. C<sub>0</sub>, untreated cells; C<sub>1</sub>, cells treated with etoposide (50  $\mu$ M). Asterisks indicate a significant difference from the control (C<sub>0</sub>). \*\*\*P $\leq$ 0.001.

**Table S1.** Effect of samples 2, 3, 4, 7, 8, 9, 11 and 13 (100 mg/mL at 72 h) on human liver cells apoptosis analyzed by flow cytometry using the TUNEL assay.

| Sample | Code       | Apoptotic cells (%) | Apoptotic cells (%) |
|--------|------------|---------------------|---------------------|
|        |            | HepG2               | WRL-68              |
| 2      | TH+2RJ     | 8.28 ± 1.22         | 3.24 ± 2.73         |
| 3      | TH+10RJ    | 8.53 ± 0.79         | 6.67 ± 1.94         |
| 4      | TH+2PR     | 6.61 ± 2.30         | 5.49 ± 1.40         |
| 7      | CH+2RJ     | 4.19 ± 1.23         | 6.11 ± 0.86         |
| 8      | CH+10RJ    | 5.71 ± 2.34         | 6.13 ± 1.03         |
| 9      | CH+2PR     | 5.95 ± 1.92         | 8.91 ± 0.67         |
| 11     | TH+2RJ+2PR | 4.74 ± 2.11         | 8.08 ± 1.12         |
| 13     | CH+2RJ+2PR | 4.13 ± 1.68         | 6.12 ± 2.45         |

Data are expressed as the means ± standard deviation (n = 3).
